# Supplementary material for: Intermolecular proton shuttling in excited state proton transfer reactions: insights from theory
Source: Royal Society of Chemistry journal article supplement (doi:10.1039/c4cp00068d), 2014-01-01
Supplement: c4cp00068d1.pdf [file c4cp00068d1.pdf]

**Electronic Supplementary Information**  
**Intermolecular Proton Shuttling in Excited State Proton Transfer**  
**Reactions : Insights from Theory**

Marika Savarese<sup>1,2</sup>, Paolo A. Netti<sup>1,2</sup>, Nadia Rega<sup>1,2\*</sup>, Carlo Adamo<sup>3,4,\*</sup>, Ilaria Ciofini<sup>3</sup>

<sup>1</sup> *Dipartimento di Chimica 'Paolo Corradini', Università di Napoli Federico II, Complesso Universitario di M.S. Angelo, via Cintia, 80126 Napoli, Italy*

<sup>2</sup> *Center for Advanced Biomaterials for Health Care@CRIB, Istituto Italiano di Tecnologia, Largo Barsanti e Matteucci n, 53 80125 Napoli*

<sup>3</sup> *LECIME, Laboratoire d'Electrochimie, Chimie des Interfaces et Modélisation pour l'Energie, UMR*

<sup>4</sup> *Institut Universitaire de France, 103 Boulevard Saint Michel, F-75005 Paris, France*

## Summary

|                                                                |      |
|----------------------------------------------------------------|------|
| Ground state minimum energy Cartesian coordinate of 1, Reagent | p.3  |
| Excited state minimum energy Cartesian coordinate of 2*        | p.5  |
| Ground state minimum energy Cartesian coordinate of 3,TS       | p.7  |
| Ground state minimum energy Cartesian coordinate of 4          | p.9  |
| Ground state minimum energy Cartesian coordinate of 5          | p.11 |
| Ground state minimum energy Cartesian coordinate of 6,TS       | p.13 |
| Ground state minimum energy Cartesian coordinate of 7          | p.15 |
| Ground state minimum energy Cartesian coordinate of 8          | p.17 |
| Excited state minimum energy Cartesian coordinate of 9*        | p.19 |
| Ground state minimum energy arrangement of structure 1         | p.21 |
| Ground state minimum energy arrangement of structure 4         | p.21 |
| Ground state minimum energy arrangement of structure 8         | p.22 |

|   |             |             |             |
|---|-------------|-------------|-------------|
| C | -4.06643800 | -0.89778500 | -0.04254900 |
| C | -1.68477000 | -0.94216300 | -0.49427000 |
| C | -1.55212900 | -2.26157400 | -0.00101600 |
| C | -2.75220600 | -2.89778900 | 0.47733600  |
| C | -3.95101900 | -2.25384700 | 0.45809900  |
| H | -0.75703700 | 0.79187400  | -1.36208800 |
| C | -0.61279000 | -0.21572700 | -0.98961600 |
| C | -0.25416300 | -2.82541600 | -0.02502700 |
| C | 0.82990500  | -2.11793200 | -0.50826900 |
| C | 0.66386900  | -0.79732000 | -1.00028100 |
| H | -0.09873700 | -3.83218400 | 0.34348100  |
| H | 1.81709200  | -2.56596000 | -0.51046600 |
| O | -2.90444800 | -0.30885300 | -0.50324800 |
| C | -2.69396100 | -4.31323600 | 1.01645200  |
| O | 1.67691900  | -0.07163500 | -1.47874900 |
| H | 2.58195400  | -0.55083900 | -1.44080000 |
| F | -3.89880500 | -4.76542800 | 1.42446800  |
| F | -2.24177500 | -5.18524900 | 0.07928200  |
| F | -1.85599900 | -4.40757800 | 2.08033200  |
| H | -4.86314400 | -2.71297100 | 0.81335100  |
| O | -5.08956300 | -0.23662800 | -0.08991200 |
| N | 4.09712000  | -1.13489200 | -1.36614900 |
| C | 5.01489600  | -0.59032800 | -0.57615400 |
| N | 6.22042900  | -1.19197600 | -0.74713900 |
| C | 6.05918400  | -2.17705700 | -1.70316100 |
| C | 4.73955000  | -2.12731500 | -2.07652800 |
| H | 4.22210200  | -2.73403700 | -2.80549900 |
| H | 4.84507400  | 0.23085200  | 0.11530400  |
| C | 7.45806600  | -0.85447400 | -0.05200700 |
| H | 7.81749600  | -1.71285600 | 0.52142500  |
| H | 8.22418800  | -0.55082100 | -0.76995400 |
| H | 7.26168300  | -0.02689300 | 0.63015000  |
| H | 6.87719100  | -2.80433100 | -2.02263500 |
| C | 3.28873800  | 3.71610300  | 2.58349400  |
| H | 3.16541200  | 4.50937400  | 3.30545700  |
| C | 4.30791900  | 2.82057900  | 2.35796300  |
| H | 5.24390100  | 2.72853800  | 2.89137200  |
| C | 2.78934100  | 2.38629500  | 0.90158600  |
| H | 2.22375400  | 1.95166900  | 0.08746900  |
| N | 3.98898800  | 1.99128000  | 1.30388500  |

|   |             |            |             |
|---|-------------|------------|-------------|
| N | 2.32018200  | 3.42892500 | 1.64361900  |
| C | 1.03772000  | 4.10996400 | 1.49016000  |
| H | 0.43492600  | 3.98839400 | 2.39433600  |
| H | 1.19872700  | 5.17582800 | 1.30732300  |
| H | 0.48796700  | 3.69118600 | 0.64663100  |
| C | -3.78235000 | 5.17749500 | -1.11321200 |
| H | -4.52318300 | 5.90649500 | -1.40575000 |
| N | -4.11021900 | 3.85920100 | -0.87244400 |
| N | -1.91253100 | 4.04262600 | -0.53590300 |
| C | -2.95306200 | 3.22401200 | -0.52998000 |
| C | -2.42554500 | 5.26948600 | -0.90103700 |
| H | -1.79592300 | 6.14370100 | -0.99332700 |
| H | -2.93395900 | 2.16831200 | -0.29926600 |
| C | -5.43491500 | 3.25369300 | -0.96388500 |
| H | -6.11929500 | 3.73050300 | -0.25642100 |
| H | -5.83176700 | 3.36323200 | -1.97707000 |
| H | -5.35528500 | 2.19201800 | -0.72415300 |

**Ground state minimum energy Cartesian coordinate of 1, Reagent.**

|   |             |             |             |
|---|-------------|-------------|-------------|
| C | -4.15073600 | -0.55446200 | -0.33575100 |
| C | -1.76924300 | -0.91005300 | -0.60183500 |
| C | -1.80324700 | -2.17519700 | -0.01501300 |
| C | -3.13289400 | -2.68750900 | 0.42451400  |
| C | -4.22547900 | -1.85127000 | 0.25282000  |
| H | -0.57333000 | 0.64684700  | -1.50922500 |
| C | -0.56686500 | -0.33779600 | -1.05556200 |
| C | -0.56474000 | -2.86352300 | 0.11429100  |
| C | 0.63841600  | -2.33514600 | -0.31715000 |
| C | 0.68135200  | -1.04084800 | -0.92320200 |
| H | -0.56577600 | -3.84660100 | 0.57169800  |
| H | 1.56006400  | -2.89415200 | -0.19397100 |
| O | -2.87328200 | -0.12870500 | -0.77918800 |
| C | -3.26522100 | -4.01142000 | 1.04089300  |
| O | 1.76108400  | -0.47498900 | -1.34866500 |
| H | 3.17234400  | -1.05603100 | -1.31599200 |
| F | -4.54275100 | -4.33221100 | 1.35599600  |
| F | -2.79107700 | -5.04258200 | 0.24571800  |
| F | -2.53372100 | -4.15361000 | 2.21287400  |
| H | -5.21564000 | -2.15757500 | 0.56834300  |
| O | -5.07101000 | 0.25379000  | -0.50906500 |
| N | 4.21583900  | -1.33576800 | -1.29858400 |
| C | 5.13086700  | -0.72920100 | -0.54135200 |
| N | 6.31985600  | -1.31621600 | -0.76006200 |
| C | 6.14897500  | -2.32984200 | -1.68996300 |
| C | 4.82459200  | -2.33615500 | -2.02460600 |
| H | 4.27849600  | -2.96178600 | -2.71237300 |
| H | 4.93372000  | 0.10810100  | 0.13426200  |
| C | 7.58280700  | -0.94498300 | -0.11895900 |
| H | 7.97153500  | -1.79262700 | 0.44881800  |
| H | 8.30764600  | -0.64455800 | -0.87795500 |
| H | 7.39920400  | -0.11002900 | 0.55626100  |
| H | 6.97006100  | -2.94352100 | -2.02436100 |
| C | 3.48291600  | 3.33000800  | 2.63151300  |
| H | 3.39244900  | 4.08502000  | 3.39777200  |
| C | 4.50131600  | 2.46849600  | 2.30000400  |
| H | 5.47169000  | 2.37215000  | 2.76665400  |
| C | 2.89695200  | 2.07473700  | 0.92109300  |
| H | 2.28801300  | 1.66405800  | 0.12583400  |
| N | 4.12815100  | 1.68556300  | 1.22788200  |

|   |             |            |             |
|---|-------------|------------|-------------|
| N | 2.46214000  | 3.07045900 | 1.74030000  |
| C | 1.15064500  | 3.71506300 | 1.71970600  |
| H | 0.55125700  | 3.38402800 | 2.57259200  |
| H | 1.27578500  | 4.79930000 | 1.76828500  |
| H | 0.62289700  | 3.46838700 | 0.79717400  |
| C | -3.27159400 | 5.41967700 | -0.90431200 |
| H | -3.93469800 | 6.25974800 | -1.04728400 |
| N | -3.73679000 | 4.12191300 | -0.85601000 |
| N | -1.52461800 | 4.01717500 | -0.59233200 |
| C | -2.64974200 | 3.32107700 | -0.66822700 |
| C | -1.90775100 | 5.33377300 | -0.74013000 |
| H | -1.18798000 | 6.14071100 | -0.72262200 |
| H | -2.74329300 | 2.24577100 | -0.60458300 |
| C | -5.12188500 | 3.67801200 | -0.98682700 |
| H | -5.74081200 | 4.14797400 | -0.21732500 |
| H | -5.51207100 | 3.94364800 | -1.97362700 |
| H | -5.15664900 | 2.59348800 | -0.86435000 |

**Excited state minimum energy Cartesian coordinate of 2\*.**

|   |           |           |           |
|---|-----------|-----------|-----------|
| 6 | -4.024550 | 0.071749  | -1.085469 |
| 6 | -1.812933 | -0.681596 | -0.394512 |
| 6 | -2.355920 | -1.823407 | 0.263583  |
| 6 | -3.767208 | -1.990544 | 0.202751  |
| 6 | -4.578544 | -1.089460 | -0.444581 |
| 1 | -0.109964 | 0.474893  | -0.961575 |
| 6 | -0.465072 | -0.402293 | -0.430595 |
| 6 | -1.418799 | -2.679156 | 0.914565  |
| 6 | -0.072319 | -2.411929 | 0.907569  |
| 6 | 0.485696  | -1.252755 | 0.232952  |
| 1 | -1.778766 | -3.559603 | 1.435453  |
| 1 | 0.619254  | -3.069633 | 1.427172  |
| 8 | -2.647687 | 0.214026  | -1.034743 |
| 6 | -4.413637 | -3.191261 | 0.861123  |
| 8 | 1.733005  | -1.000585 | 0.238925  |
| 9 | -5.758048 | -3.216678 | 0.709380  |
| 9 | -3.946243 | -4.362625 | 0.351063  |
| 9 | -4.176255 | -3.229512 | 2.199885  |
| 1 | -5.651516 | -1.206437 | -0.494504 |
| 8 | -4.649155 | 0.951335  | -1.668979 |
| 6 | 4.784991  | -3.292116 | -1.545959 |
| 1 | 4.780161  | -4.257879 | -2.025881 |
| 6 | 4.397914  | 2.504197  | 2.368576  |
| 1 | 4.873159  | 3.242257  | 2.996329  |
| 6 | 4.858254  | 1.334853  | 1.815979  |
| 1 | 5.838970  | 0.889561  | 1.902526  |
| 6 | 2.792132  | 1.540636  | 1.205354  |
| 1 | 1.826532  | 1.347244  | 0.766200  |
| 7 | 3.844934  | 0.742112  | 1.092152  |
| 7 | 3.081643  | 2.623622  | 1.966265  |
| 6 | 2.151100  | 3.690170  | 2.335849  |
| 1 | 1.297915  | 3.681279  | 1.652746  |
| 1 | 1.802913  | 3.549247  | 3.363106  |
| 1 | 2.659215  | 4.653907  | 2.256885  |
| 6 | -1.761718 | 5.759750  | -1.033627 |
| 1 | -2.184591 | 6.646678  | -1.481260 |
| 7 | -2.331061 | 4.514905  | -1.202854 |
| 7 | -0.533190 | 4.225890  | 0.084555  |
| 6 | -1.555810 | 3.631102  | -0.512468 |
| 6 | -0.656653 | 5.560701  | -0.238392 |

|   |           |           |           |
|---|-----------|-----------|-----------|
| 1 | 0.049140  | 6.299257  | 0.116361  |
| 1 | -1.783870 | 2.574397  | -0.487896 |
| 6 | -3.527547 | 4.201451  | -1.979646 |
| 1 | -4.378856 | 4.776040  | -1.604257 |
| 1 | -3.367156 | 4.444921  | -3.033939 |
| 1 | -3.749960 | 3.136627  | -1.887549 |
| 7 | 4.354360  | -1.432188 | -0.424210 |
| 1 | 3.860131  | -0.570512 | 0.249030  |
| 6 | 3.842603  | -2.655247 | -0.784490 |
| 1 | 2.850586  | -2.940686 | -0.478693 |
| 6 | 5.570665  | -1.318803 | -0.947091 |
| 1 | 6.223283  | -0.465409 | -0.847723 |
| 7 | 5.869364  | -2.434701 | -1.640167 |
| 6 | 7.109400  | -2.691206 | -2.371362 |
| 1 | 6.892879  | -2.834276 | -3.432049 |
| 1 | 7.773484  | -1.834661 | -2.253402 |
| 1 | 7.598054  | -3.582576 | -1.972506 |

**Ground state minimum energy Cartesian coordinate of 3, TS.**



|   |             |             |             |
|---|-------------|-------------|-------------|
| C | -3.87013400 | 0.05235300  | -0.59557700 |
| C | -1.75226600 | -0.83507000 | 0.20913600  |
| C | -2.30200500 | -2.14023800 | 0.36273700  |
| C | -3.67356400 | -2.30612400 | 0.01839300  |
| C | -4.43583300 | -1.26154400 | -0.44262800 |
| H | -0.07920500 | 0.48036900  | 0.35428800  |
| C | -0.43972300 | -0.53200500 | 0.50098700  |
| C | -1.41450600 | -3.14514800 | 0.84653600  |
| C | -0.10388000 | -2.86472600 | 1.14545700  |
| C | 0.45893600  | -1.53888600 | 0.98747700  |
| H | -1.78262200 | -4.15563900 | 0.98529800  |
| H | 0.55295600  | -3.64455600 | 1.52026500  |
| O | -2.53853700 | 0.20202300  | -0.25356700 |
| C | -4.32628900 | -3.66594000 | 0.15195500  |
| O | 1.68198400  | -1.28954500 | 1.26361800  |
| F | -5.63344200 | -3.65992100 | -0.19767600 |
| F | -3.72108500 | -4.59793800 | -0.63298200 |
| F | -4.26946800 | -4.13627200 | 1.42635000  |
| H | -5.47709400 | -1.37539900 | -0.70816200 |
| O | -4.45606800 | 1.05099400  | -0.99969900 |
| C | 4.90153300  | -3.13375900 | -0.74110500 |
| H | 4.63117100  | -4.17658400 | -0.78612100 |
| C | 3.86435700  | 3.58462000  | 1.04092200  |
| H | 3.85491800  | 4.65007000  | 1.21148700  |
| C | 4.76822200  | 2.76368600  | 0.41386400  |
| H | 5.70494300  | 3.02759800  | -0.05537500 |
| C | 3.14515500  | 1.50038600  | 1.10191400  |
| H | 2.50945500  | 0.63643900  | 1.29113000  |
| N | 4.30954000  | 1.46323400  | 0.45645000  |
| N | 2.84089800  | 2.76602900  | 1.47538300  |
| C | 1.62271000  | 3.19170700  | 2.16700100  |
| H | 1.11456500  | 2.30476100  | 2.54783300  |
| H | 1.88879600  | 3.83434100  | 3.00973700  |
| H | 0.95672900  | 3.72621200  | 1.48206100  |
| C | -2.24511100 | 6.09712500  | -0.93604600 |
| H | -2.79507400 | 6.93627300  | -1.33505300 |
| N | -2.73882900 | 4.81026300  | -0.98942600 |
| N | -0.75396600 | 4.69178300  | 0.01934200  |
| C | -1.80611000 | 4.00647200  | -0.40383500 |
| C | -1.02278100 | 6.00302700  | -0.31114600 |

|   |             |             |             |
|---|-------------|-------------|-------------|
| H | -0.32871800 | 6.80019400  | -0.08283700 |
| H | -1.95077800 | 2.93790500  | -0.31693000 |
| C | -4.01049800 | 4.38533100  | -1.56735700 |
| H | -4.83687300 | 4.91401500  | -1.08409100 |
| H | -4.02725800 | 4.59712200  | -2.64046900 |
| H | -4.13048100 | 3.31248800  | -1.40876000 |
| N | 5.05427700  | -0.95642700 | -0.41598000 |
| H | 4.81516200  | 0.06527300  | -0.08765300 |
| C | 4.26591400  | -2.06301300 | -0.17502200 |
| H | 3.32435000  | -1.98069200 | 0.36712600  |
| C | 6.13053000  | -1.33383700 | -1.10282800 |
| H | 6.92852000  | -0.68945300 | -1.43744400 |
| N | 6.06880300  | -2.65870100 | -1.31842500 |
| C | 7.05640700  | -3.46341500 | -2.03850900 |
| H | 6.58302500  | -3.94517500 | -2.89617600 |
| H | 7.85835200  | -2.81332400 | -2.38782700 |
| H | 7.47063800  | -4.22211100 | -1.37173000 |

**Ground state minimum energy Cartesian coordinate of 4.**

|   |             |             |             |
|---|-------------|-------------|-------------|
| C | -3.76560700 | 0.25546700  | -0.91089500 |
| C | -1.78758700 | -0.71865000 | 0.11954600  |
| C | -2.46745400 | -1.94072800 | 0.38596500  |
| C | -3.82697300 | -2.02437400 | -0.02938500 |
| C | -4.45945000 | -0.97784900 | -0.65366900 |
| H | -0.00638500 | 0.44781400  | 0.21139500  |
| C | -0.46840800 | -0.50249100 | 0.45669400  |
| C | -1.70804600 | -2.95503800 | 1.03966600  |
| C | -0.39484700 | -2.75921600 | 1.38946600  |
| C | 0.29986800  | -1.51832600 | 1.11629200  |
| H | -2.17825900 | -3.90495900 | 1.26833000  |
| H | 0.16433200  | -3.54343400 | 1.89119500  |
| O | -2.44430700 | 0.32337000  | -0.50489900 |
| C | -4.61464000 | -3.29446500 | 0.21594500  |
| O | 1.52415400  | -1.34871500 | 1.44699000  |
| F | -5.88302900 | -3.22561800 | -0.25015800 |
| F | -4.04139100 | -4.37226700 | -0.38303600 |
| F | -4.70463600 | -3.58738900 | 1.54066700  |
| H | -5.49027500 | -1.03007700 | -0.97349500 |
| O | -4.23135800 | 1.25208800  | -1.45278800 |
| C | 4.78795800  | -3.32014300 | -0.90231300 |
| H | 4.45833300  | -4.34527500 | -0.97354600 |
| C | 3.76681900  | 3.27746800  | 1.35335500  |
| H | 3.76058400  | 4.32729200  | 1.59848700  |
| C | 4.66271100  | 2.52292700  | 0.65031700  |
| H | 5.58959500  | 2.79815200  | 0.17341100  |
| C | 3.01686500  | 1.19200400  | 1.29801500  |
| H | 2.38963100  | 0.29533300  | 1.42118500  |
| N | 4.17403700  | 1.23413000  | 0.62949000  |
| N | 2.74938700  | 2.42619000  | 1.75093300  |
| C | 1.54695500  | 2.81693300  | 2.49807000  |
| H | 1.01973100  | 1.91100300  | 2.79664800  |
| H | 1.84596400  | 3.37007500  | 3.39067800  |
| H | 0.90347000  | 3.43034900  | 1.85887500  |
| C | -1.54157400 | 6.04267300  | -0.99217800 |
| H | -1.93393300 | 6.93205700  | -1.46206600 |
| N | -2.13464800 | 4.80840800  | -1.15673500 |
| N | -0.37500200 | 4.49876600  | 0.17598600  |
| C | -1.39686700 | 3.91729400  | -0.43653900 |
| C | -0.46034000 | 5.83138600  | -0.16820200 |

|   |             |             |             |
|---|-------------|-------------|-------------|
| H | 0.25285700  | 6.55922500  | 0.19361500  |
| H | -1.65226200 | 2.86667700  | -0.39890200 |
| C | -3.32067800 | 4.50782100  | -1.95443600 |
| H | -4.16400700 | 5.11471900  | -1.61369700 |
| H | -3.12906700 | 4.71960400  | -3.01035300 |
| H | -3.56912400 | 3.45183100  | -1.83582700 |
| N | 5.06161000  | -1.12815700 | -0.48987100 |
| H | 4.60473600  | 0.37863900  | 0.16573700  |
| C | 4.24354800  | -2.22361900 | -0.28131700 |
| H | 3.32718500  | -2.14517700 | 0.29304500  |
| C | 6.07603400  | -1.56277900 | -1.22329900 |
| H | 6.90749800  | -0.96840500 | -1.57514900 |
| N | 5.95702100  | -2.88711100 | -1.49932100 |
| C | 6.87787900  | -3.69705800 | -2.28886600 |
| H | 6.38143500  | -4.06930000 | -3.18869900 |
| H | 7.72942000  | -3.08129900 | -2.58172700 |
| H | 7.23830600  | -4.54232600 | -1.69759400 |

**Ground state minimum energy Cartesian coordinate of 5.**

|   |             |             |             |
|---|-------------|-------------|-------------|
| C | 4.14127900  | 0.28303300  | -0.12706500 |
| C | 1.98064400  | -0.75422100 | 0.29505400  |
| C | 2.53935100  | -2.06134800 | 0.23116900  |
| C | 3.93940000  | -2.15113500 | -0.01531200 |
| C | 4.71744800  | -1.03355900 | -0.18841700 |
| H | 0.28589700  | 0.50461000  | 0.57734900  |
| C | 0.64274900  | -0.51873700 | 0.53156500  |
| C | 1.63260600  | -3.14454900 | 0.42426100  |
| C | 0.29595400  | -2.93302400 | 0.65668800  |
| C | -0.27401800 | -1.60421900 | 0.72190700  |
| H | 2.00624800  | -4.16168500 | 0.38603700  |
| H | -0.37823300 | -3.77208500 | 0.80000600  |
| O | 2.78044400  | 0.35655800  | 0.11596400  |
| C | 4.60731900  | -3.50868300 | -0.08650400 |
| O | -1.52327400 | -1.42180700 | 0.93422200  |
| F | 5.93604200  | -3.42926800 | -0.32811100 |
| F | 4.46565000  | -4.20325300 | 1.07356900  |
| F | 4.08074900  | -4.28385600 | -1.07175100 |
| H | 5.78026600  | -1.08930300 | -0.37560100 |
| O | 4.73683200  | 1.34523500  | -0.26925700 |
| C | -5.42185100 | -2.88256900 | -0.81675800 |
| H | -5.14230400 | -3.85349700 | -1.19745600 |
| C | -3.66276900 | 3.16628500  | 0.66571300  |
| H | -3.79380000 | 4.07147000  | 0.09547200  |
| C | -4.13917200 | 2.80622600  | 1.89092300  |
| H | -4.77121300 | 3.33009000  | 2.58878500  |
| C | -2.90108900 | 1.12635400  | 1.10388400  |
| H | -2.36579400 | 0.16185100  | 1.02400700  |
| N | -3.64308300 | 1.54136800  | 2.13945500  |
| N | -2.89844200 | 2.10855200  | 0.19793500  |
| C | -2.17774700 | 2.07672800  | -1.08237700 |
| H | -1.77575300 | 1.07382000  | -1.22257800 |
| H | -2.87955700 | 2.29982800  | -1.88821200 |
| H | -1.36528600 | 2.81024900  | -1.05739300 |
| C | 1.87330200  | 6.01509300  | -0.64361200 |
| H | 2.36693900  | 6.97383800  | -0.69699100 |
| N | 2.57679300  | 4.84027800  | -0.47808400 |
| N | 0.42176100  | 4.28308100  | -0.59286500 |
| C | 1.66073300  | 3.83183000  | -0.45359400 |
| C | 0.54846300  | 5.65115600  | -0.71268100 |

|   |             |             |             |
|---|-------------|-------------|-------------|
| H | -0.31188700 | 6.29312100  | -0.84295900 |
| H | 1.95576200  | 2.79826200  | -0.33075100 |
| C | 4.02465400  | 4.69942300  | -0.34638300 |
| H | 4.52315100  | 5.12887500  | -1.21972300 |
| H | 4.37288100  | 5.21224700  | 0.55480100  |
| H | 4.27161000  | 3.63873500  | -0.27824600 |
| N | -5.52719900 | -0.83589500 | 0.13497000  |
| H | -3.84431200 | 0.96919700  | 2.94842800  |
| C | -4.71372200 | -1.92070100 | -0.13411100 |
| H | -3.67572200 | -1.94648200 | 0.17446700  |
| C | -6.70417300 | -1.14809900 | -0.38075500 |
| H | -7.59186500 | -0.53001700 | -0.35864000 |
| N | -6.69844400 | -2.37853900 | -0.97111900 |
| C | -7.81803200 | -3.03383400 | -1.63336600 |
| H | -8.06463000 | -3.97306400 | -1.13050700 |
| H | -8.68672000 | -2.37443800 | -1.59428600 |
| H | -7.57736900 | -3.23874300 | -2.68022700 |

**Ground state minimum energy Cartesian coordinate of 6, TS.**

|   |             |             |             |
|---|-------------|-------------|-------------|
| C | -4.06862700 | 0.67456000  | -0.78560000 |
| C | -2.00001500 | -0.57921500 | -0.45835000 |
| C | -2.71692600 | -1.74773700 | -0.06895600 |
| C | -4.13387400 | -1.66153700 | -0.07297900 |
| C | -4.79575100 | -0.50369300 | -0.41982100 |
| H | -0.13857800 | 0.39082700  | -0.84524600 |
| C | -0.62747900 | -0.51851300 | -0.51248700 |
| C | -1.92226500 | -2.88253100 | 0.28251200  |
| C | -0.55182700 | -2.83914000 | 0.26004400  |
| C | 0.18145300  | -1.64384000 | -0.12367200 |
| H | -2.41594900 | -3.80083700 | 0.58065000  |
| H | 0.03184200  | -3.71133300 | 0.53973100  |
| O | -2.68478300 | 0.57472400  | -0.79672100 |
| C | -4.96395100 | -2.86801200 | 0.31557200  |
| O | 1.44994500  | -1.58711500 | -0.10087500 |
| F | -6.29501800 | -2.63278100 | 0.25125200  |
| F | -4.72072800 | -3.93370600 | -0.49203000 |
| F | -4.70448100 | -3.27446900 | 1.58699100  |
| H | -5.87371200 | -0.43158700 | -0.42206900 |
| O | -4.53642400 | 1.77113200  | -1.08565000 |
| C | 5.47082700  | -2.09840600 | -1.86399800 |
| H | 5.07118000  | -2.56940400 | -2.74953500 |
| C | 2.21379700  | 2.75745400  | 2.88986100  |
| H | 2.06130400  | 3.75276700  | 3.28153500  |
| C | 2.93606700  | 1.72389900  | 3.43210200  |
| H | 3.51415700  | 1.64666500  | 4.33994400  |
| C | 2.02917300  | 1.08075700  | 1.52872300  |
| H | 1.77605300  | 0.41660100  | 0.70943700  |
| N | 2.80318600  | 0.66510500  | 2.55729400  |
| N | 1.64985600  | 2.34577200  | 1.69826600  |
| C | -0.58104800 | 5.48544000  | -1.18287400 |
| H | -0.71039700 | 6.40103200  | -1.73755600 |
| N | -1.54157500 | 4.48944200  | -1.18218300 |
| N | 0.09759900  | 3.79817300  | 0.07849600  |
| C | -1.10267300 | 3.48157500  | -0.41064000 |
| C | 0.44361200  | 5.04594400  | -0.39231100 |
| H | 1.37948200  | 5.51513300  | -0.13364000 |
| H | -1.64113100 | 2.55845300  | -0.24874600 |
| C | -2.81778800 | 4.51963400  | -1.90805300 |
| H | -3.39294400 | 5.39068000  | -1.58760900 |

|   |             |             |             |
|---|-------------|-------------|-------------|
| H | -2.62154900 | 4.58169100  | -2.98048000 |
| H | -3.37461100 | 3.60760900  | -1.68433100 |
| N | 5.82134400  | -1.09772000 | 0.13083400  |
| C | 4.86775900  | -1.61008600 | -0.72799400 |
| H | 3.81201900  | -1.60302200 | -0.48871500 |
| C | 6.97704500  | -1.27814300 | -0.48468800 |
| H | 7.94971800  | -0.99622400 | -0.10400700 |
| N | 6.82516500  | -1.88121500 | -1.69998600 |
| C | 7.88177400  | -2.23074100 | -2.63882700 |
| H | 7.73506200  | -1.71433500 | -3.59166500 |
| H | 8.84232100  | -1.92764000 | -2.21867900 |
| H | 7.89839300  | -3.31014600 | -2.81395500 |
| C | 3.41139300  | -0.66259600 | 2.67413000  |
| H | 2.83829200  | -1.35398400 | 2.05397100  |
| H | 4.44475800  | -0.64124400 | 2.31851900  |
| H | 3.37227100  | -0.98402000 | 3.71684700  |
| H | 0.72107900  | 3.17365200  | 0.74643000  |

**Ground state minimum energy Cartesian coordinate of 7.**



|   |             |             |             |
|---|-------------|-------------|-------------|
| C | -3.84741200 | 0.37112400  | -0.60920800 |
| C | -1.73419300 | -0.81611700 | -0.59723100 |
| C | -2.37905400 | -2.03936900 | -0.23593600 |
| C | -3.78498100 | -2.00490500 | -0.10427100 |
| C | -4.51359600 | -0.84057900 | -0.28837500 |
| H | 0.03932800  | 0.26404400  | -1.05989800 |
| C | -0.38016200 | -0.69118200 | -0.76695800 |
| C | -1.51502100 | -3.16463100 | -0.03939300 |
| C | -0.15601700 | -3.05723500 | -0.16617400 |
| C | 0.50231400  | -1.80211500 | -0.51206600 |
| H | -1.94755700 | -4.12277200 | 0.22628800  |
| H | 0.48245200  | -3.91936600 | 0.00244200  |
| O | -2.48855800 | 0.32926400  | -0.78022600 |
| C | -4.54160000 | -3.26727200 | 0.25786900  |
| O | 1.76072200  | -1.69155500 | -0.56523000 |
| F | -5.87715800 | -3.06918300 | 0.34887300  |
| F | -4.35723600 | -4.24933500 | -0.66267200 |
| F | -4.14306200 | -3.77288200 | 1.45457900  |
| H | -5.58710900 | -0.80413500 | -0.17546000 |
| O | -4.36889000 | 1.49531900  | -0.74773100 |
| C | 6.04378700  | -1.79093800 | -1.57926500 |
| H | 5.85941500  | -2.38917100 | -2.45901000 |
| C | 1.04831600  | 2.64950200  | 2.95404100  |
| H | 0.58225400  | 3.47746700  | 3.47029500  |
| C | 1.80357400  | 1.63314700  | 3.49146000  |
| H | 2.10925800  | 1.41363700  | 4.50322400  |
| C | 1.61305600  | 1.37727300  | 1.31617200  |
| H | 1.74006200  | 0.91816100  | 0.34651900  |
| N | 2.15349400  | 0.82326300  | 2.43185400  |
| N | 0.93055100  | 2.48374800  | 1.58795100  |
| C | -1.85049200 | 5.54634600  | -1.50111800 |
| H | -1.64796000 | 6.52896100  | -1.89592600 |
| N | 5.92651000  | -0.56512900 | 0.31511500  |
| C | 5.19925100  | -1.26267100 | -0.63023000 |
| H | 4.12168900  | -1.35103200 | -0.57952400 |
| C | 7.18741000  | -0.67605700 | -0.06507400 |
| H | 8.04334200  | -0.25133200 | 0.44239800  |
| N | 7.31895200  | -1.40975900 | -1.20908200 |
| C | 8.55786300  | -1.72865300 | -1.90392000 |
| H | 8.54818500  | -1.31537800 | -2.91658600 |

|   |             |             |             |
|---|-------------|-------------|-------------|
| H | 9.39399500  | -1.29323300 | -1.35397400 |
| H | 8.69877300  | -2.81179800 | -1.95946700 |
| C | 2.97337900  | -0.38869400 | 2.47182100  |
| H | 2.70273900  | -1.01838800 | 1.62182700  |
| H | 4.03610500  | -0.14163800 | 2.40699800  |
| H | 2.77095000  | -0.92683600 | 3.40003400  |
| C | -2.93264900 | 4.72509200  | -1.64327200 |
| C | -1.46177500 | 3.68524400  | -0.36404100 |
| H | -0.95177400 | 2.96380400  | 0.26522900  |
| H | -3.85339600 | 4.85979800  | -2.18757100 |
| N | -2.66711000 | 3.57749000  | -0.92848200 |
| H | -3.30788000 | 2.73855700  | -0.85434800 |
| N | -0.94326200 | 4.87707900  | -0.69728800 |
| C | 0.37301800  | 5.37132000  | -0.27597600 |
| H | 0.24793100  | 6.29076800  | 0.29944000  |
| H | 0.84083400  | 4.60190100  | 0.34023300  |
| H | 0.98521500  | 5.56775300  | -1.15829800 |

**Ground state minimum energy Cartesian coordinate of 8.**

|   |           |           |           |
|---|-----------|-----------|-----------|
| C | -2.664740 | 1.611737  | -0.734330 |
| C | -1.780056 | -0.495239 | -0.002829 |
| C | -3.025733 | -1.120539 | -0.020615 |
| C | -4.192820 | -0.290145 | -0.428308 |
| C | -3.960564 | 1.026670  | -0.767481 |
| H | 0.343493  | -0.638699 | 0.364874  |
| C | -0.601190 | -1.170235 | 0.361950  |
| C | -3.056526 | -2.494890 | 0.351423  |
| C | -1.926670 | -3.198897 | 0.717936  |
| C | -0.631253 | -2.566998 | 0.742669  |
| H | -4.011163 | -3.010383 | 0.346109  |
| H | -1.989338 | -4.245897 | 0.995787  |
| O | -1.596938 | 0.819478  | -0.339919 |
| C | -5.552094 | -0.859299 | -0.472528 |
| O | 0.443896  | -3.162715 | 1.072795  |
| F | -6.493965 | 0.035860  | -0.860639 |
| F | -5.663439 | -1.933311 | -1.331786 |
| F | -5.970913 | -1.358684 | 0.743205  |
| H | -4.766392 | 1.681100  | -1.076263 |
| O | -2.378778 | 2.804135  | -1.028216 |
| C | 3.749490  | -3.291750 | -1.919733 |
| H | 3.383934  | -4.197574 | -2.379516 |
| C | 1.529690  | 1.427925  | 3.376440  |
| H | 0.993404  | 2.262998  | 3.805552  |
| C | 1.729118  | 0.180012  | 3.918310  |
| H | 1.414833  | -0.264898 | 4.850261  |
| C | 2.688030  | 0.317152  | 1.939599  |
| H | 3.241211  | -0.002123 | 1.062782  |
| N | 2.475988  | -0.517478 | 2.992890  |
| N | 2.132214  | 1.508396  | 2.137344  |
| C | 1.664745  | 5.278432  | -1.313744 |
| H | 2.317162  | 6.064633  | -1.658644 |
| N | 4.111744  | -1.452949 | -0.659382 |
| C | 3.280073  | -2.536447 | -0.870607 |
| H | 2.402144  | -2.713884 | -0.260935 |
| C | 5.063875  | -1.561183 | -1.570839 |
| I | 5.896653  | -0.883471 | -1.703429 |
| N | 4.894055  | -2.658623 | -2.363323 |
| C | 5.753462  | -3.084497 | -3.459601 |
| H | 5.192199  | -3.113263 | -4.397626 |
| H | 6.574605  | -2.373005 | -3.561530 |

|   |           |           |           |
|---|-----------|-----------|-----------|
| H | 6.168360  | -4.075936 | -3.258092 |
| C | 2.867409  | -1.924433 | 3.069775  |
| H | 2.052114  | -2.561186 | 2.714002  |
| H | 3.741420  | -2.080047 | 2.435675  |
| H | 3.124255  | -2.171525 | 4.101923  |
| C | 0.378377  | 4.962583  | -1.649343 |
| C | 1.052817  | 3.502631  | -0.138861 |
| H | 1.111310  | 2.678404  | 0.566312  |
| H | -0.301762 | 5.427328  | -2.344857 |
| N | 0.022083  | 3.857452  | -0.907205 |
| H | -0.931217 | 3.367318  | -0.934774 |
| N | 2.067563  | 4.352393  | -0.366268 |
| C | 3.376351  | 4.291463  | 0.292690  |
| H | 3.561338  | 5.228160  | 0.822658  |
| H | 3.358961  | 3.461471  | 1.000187  |
| H | 4.155616  | 4.129834  | -0.454982 |

**Excited state minimum energy Cartesian coordinate of 9\*.**

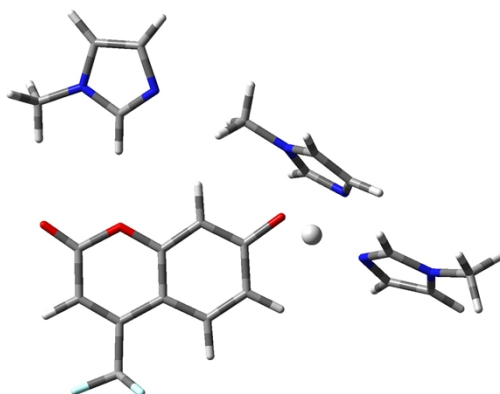

**Ground state minimum energy arrangement of structure 1.**

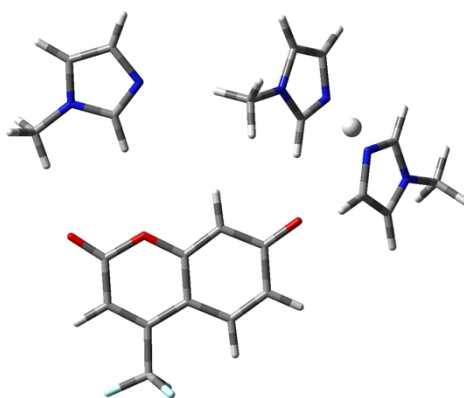

**Ground state minimum energy arrangement of structure 4.**

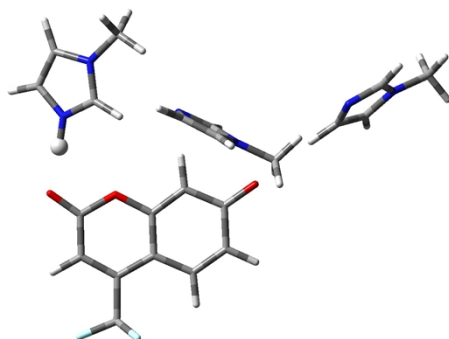

**Ground state minimum energy arrangement of structure 8.**
